# Supplementary material
Source: PubMed Central journal article supplement (PMC7417162)
Supplement: mmc1.pdf [file mmc1.pdf]

# THE LANCET

## Global Health

### Supplementary appendix

This appendix formed part of the original submission. We post it as supplied by the authors.

Supplement to: Blandford A, Wesson J, Amalberti, Raed AlHazme R, Allwihan R. Opportunities and challenges for telehealth within, and beyond, a pandemic. *Lancet Glob Health* 2020; published online Aug 10. [http://dx.doi.org/10.1016/S2214-109X\(20\)30362-4](http://dx.doi.org/10.1016/S2214-109X(20)30362-4).

## Opportunities and challenges for telehealth within, and beyond, a pandemic

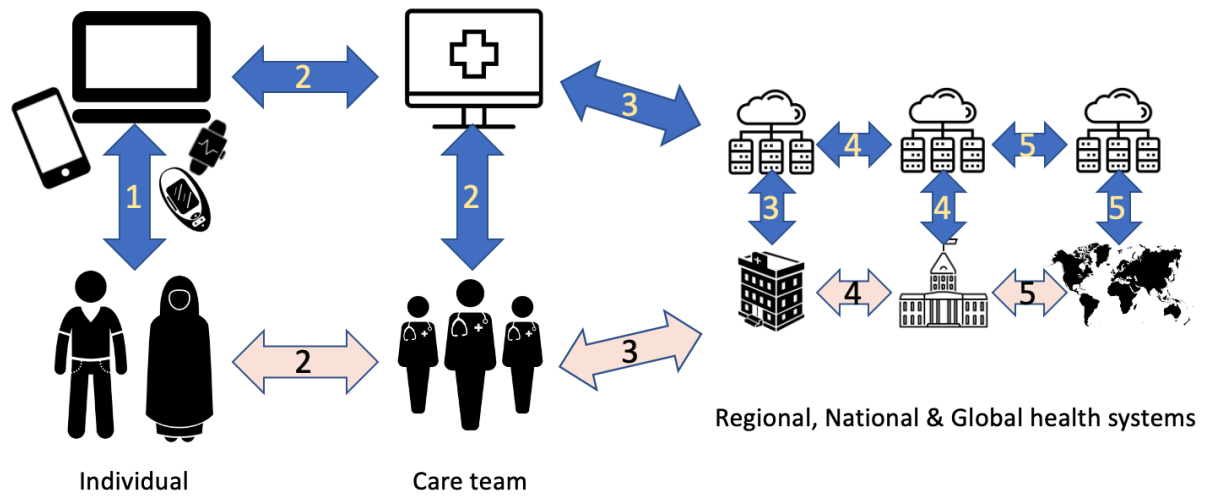

Figure 1: Telehealth managed by (1) individuals and (2) care organisations, sharing data with (3) regional, (4) national and (5) global health systems, with suitable levels of detail.
